# Supplementary material for: Is the Link from Working Memory to Analogy Causal? No Analogy Improvements following Working Memory Training Gains
Source: PLoS One. 2014 Sep 4;9(9):e106616. doi: 10.1371/journal.pone.0106616 (PMC4154731; doi:10.1371/journal.pone.0106616)
Supplement: Dataset S1 — Dataset including participants’ pre-training and post-training scores across all reported measures. (XLSX) [file pone.0106616.s001.xlsx]

## Sheet: Sheet1
Participant	Condition (0 = control, 1 = wm training)	Digit span pre	Digit span post	Digit span change	Spatial WM accuracy pre	Spatial WM reaction time Pre	Spatial WM accuracy Post	Spatial WM reaction time Post	Spatial WM accuracy change	CWM training - verbal pre	CWM training - verbal post	CWM training - verbal change	CWM training - spatial pre	CWM training - spatial post	CWM training - spatial change	Verbal analogy accuracy pre	Verbal analogy accuracy post	Verbal analogy time pre	Verbal analogy time post	Visual analogy accuracy	visual analogy total time
1	0	9	9	0	0.88	290.32	0.96	228.35	0.08							0.58	0.58	8612	9606	0.88	61611
2	0	9	8	-1	0.87	327.21	0.88	367.19	0.01								0.41		16168
3	0	7	8	1	0.79	257.42	0.88	255.33	0.08							0.58	0.63	13973	19751	0.88	116220
4	0	8	8	0	0.75	362.89	0.75	486.44	0							0.57	0.5	11165	8253	1	85934
5	0	8	9	1	0.83	505.2	0.75	458.28	-0.08							0.58	0.65	8991	6109	0.88	91433
6	0	5	9	4	0.83	483.7	0.83	434.25	0							0.48	0.43	12567	7569	0.88	95123
7	0	8	10	2	0.75	789.56	0.79	485.84	0.04								0.63		13116
8	0	8	9	1	0.83	316.9	0.83	397.7	0							0.5	0.48	7262	6436	1	87722
9	0	8	8	0	0.83	297.45	0.92	133.59	0.08							0.38	0.5	4906	8175	0.88	95757
10	0	10	10	0	0.79	249.95	0.83	243.35	0.04								0.45		12711	0.88	123031
11	0	8	7	-1	0.92	326.41	0.96	165.83	0.04							0.6	0.7	7088	6342	0.88	55071
13	0	7	7	0	0.63	249.4	0.79	304.47	0.17							0.45	0.45	17788	15891	0.75	140969
14	0	9	8	-1	0.79	319.53	0.92	242.68	0.13							0.68	0.6	7347	8500	1	133373
16	0	7	8	1												0.55	0.45	11060.3	13565	0.5	121261
17	0	7	9	2													0.63		6926	0.75	100973
18	0	7	8	1	0.96	993.04	0.83	503.85	-0.13							0.53	0.48	10494.6	6227	0.75	94336
19	0	7	6	-1													0.53		8407	0.88	137519
20	0	8	8	0	0.92	354.45	0.88	215.67	-0.04							0.65	0.4	10040.5	8135	0.5	101177
21	0	8	8	0	0.75	466.78	0.79	412	0.04							0.38	0.48	5460.88	7028	0.38	95353
22	0	9	8	-1	0.79	628.68	0.75	911.22	-0.04							0.68	0.6	9993.7	10006	0.75	130351
23	0	8	9	1	0.83	818.15	0.88	570.86	0.04							0.45	0.68	16468.5	6255	0.63	122982
24	0	9	9	0	0.83	481.65	0.79	463.63	-0.04							0.53	0.48	10442.8	7251	0.38	63297
25	0	8	8	0	0.79	945.84	0.67	1504	-0.13							0.23	0.55	14232	11029	0.75	136259
26	0	8	10	2	0.75	322.67	0.88	263.05	0.13							0.5	0.38	6865.65	6364	0.63	80958
27	0	7	7	0	0.79	845.21	0.75	593.33	-0.04							0.43	0.58	8748.68	8790	0.88	136226
28	0	4	5	1	0.96	380.35	0.92	383.64	-0.04							0.6	0.53	7902.23	7542	0.75	102616
29	0	8	8	0	0.75	211.89	0.75	387.17	0							0.48	0.53	8694.33	8306	0.75	106590
30	0	7	6	-1	0.67	573.44	0.75	843.06	0.08							0.58	0.53	6578.2	6419	0.63	59703
301	0	8	7		0.79	901.21	0.83	301.2								0.5	0.6	7898.18	6574	0.75	101431
100	1	8	8	0	0.82	499.98	0.88	293.38	0.06	6	10	4	3	8	5	0.65	0.55	12833.6	6899.9	0.63	88546
101	1	8	8	0	0.63	329.8	0.83	465.35	0.21	3	6	3	3	5	2	0.43	0.55	10585.5	9089.43	0.13	99139
102	1	8	9	1	0.79	505.79	0.79	456.47	0	6	8	2	4	7	3	0.73	0.58	12656.8	13394.1	1	111056
103	1	7	8	1	0.79	1223.58	0.83	435.95	0.04	3	5	2	3	3	0	0.33	0.53	13812.2	9097.18	0.88	146261
104	1				0.79	272.47	0.96	190.04	0.17	4	8	4	3	6	3	0.6	0.5	12888.5	7647.13	0.63	74748
105	1	8	10	2	0.71	434.24	0.75	953.22	0.04	4	8	4	2	5	3	0.5	0.6	10122.2	8527.55	0.63	111627
106	1				0.92	372.77	0.92	582.68	0	6	11	5	4	7	3	0.63	0.65	6367.53	5862.93	0.88	106088
107	1	8	9	1	0.79	499.95	0.92	659.91	0.13	3	9	6	2	7	5	0.43	0.5	8072.58	7152.33	0.63	112575
108	1				0.79	485.11	0.92	366.41	0.13	7	7	0	3	7	4	0.4	0.35	8107.83	8430.08	0.63	145227
110	1	8	8	0	0.83	260.7	0.92	430.91	0.08	5	9	4	3	6	3	0.63	0.6	12902.1	9422.73	0.88	88086
111	1	8	9	1	0.83	499.2	0.88	813.33	0.04	5	7	2	3	5	2	0.4	0.5	8915.5	11557.9	0.88	97266
112	1				0.88	434.57	0.92	567.36	0.04	6	10	4	5	8	3	0.7	0.65	5318.98	8304.3	0.88	70496
113	1				0.92	641.68	0.96	518.22	0.04	3	8	5	3	6	3	0.68	0.65	16696.2	18528.5	0.88	111148
114	1	8	9	1	0.83	522.55	1	323.21	0.17	5	10	5	4	8	4	0.63	0.6	6592.43	7484.88	1	87786
115	1				0.92	478.77	0.71	789.12	-0.21	4	9	5	2	6	4	0.48	0.53	9519.45	12911.1	0.75	96785
116	1				0.79	645.21	0.83	277.25	0.04	5	7	2	3	7	4	0.63	0.5	10786.1	12116.7	0.88	104336
118	1	9	8	-1	0.79	538.74	0.88	611.57	0.08	6	7	1	2	5	3	0.6	0.53	5883.93	10761.5	1	98506
119	1	8	7	-1	0.88	473.62	0.71	387.59	-0.17	4	6	2	3	6	3	0.4	0.38	4900.4	6940.38	0.38	94342
120	1	8	8	0	0.83	638.2	0.83	673.1	0	5	5	0	4	5	1	0.58	0.5	6477.33	6864.75	0.88	75725
121	1	9	10	1	0.88	245.52	0.96	436.48	0.08	7	9	2	3	7	4	0.53	0.68	12989.1	10959.9	0.75	101739
122	1	8	8	0	0.88	494.62	0.88	334.19	0	5	9	4	3	9	6	0.53	0.58	9647.33	10010.8	1	71589
123	1	8	8	0	0.71	1218.59	0.71	615.76	0	6	13	7	3	7	4	0.48	0.65	8727.5	11236.1	0.5	97744
124	1	7	9	2	0.79	528.53	0.92	684.32	0.13	6	16	10	3	7	4	0.5	0.4	11718.1	10078.1	0.75	105660
125	1	9	10	1	0.79	353.32	0.92	304	0.13	6	12	6	3	8	5	0.6	0.5	7336.6	7358.7	1	82662
126	1	9	9	0	0.79	341.95	0.71	812.94	-0.08	3	11	8	3	6	3	0.65	0.55	8438.73	9320.3	0.88	77104
					Spatial WM RT Pre
					Spatial WM accuracy Post
					Spatial WM RT Post
					Pre-test verbal accuracy
					Pre-test verbal average time
					Pre-test verbal average time w/o outliers (2SD)
					Pre-test verbal average time w/o outliers (3SD)
					Pre-test verbal average time - Correct only
					Pre-test verbal median time
					Post-test verbal accuracy
					Post-test verbal average time
					Post-test verbal average time w/o outliers (2SD)
					Post-test verbal average time w/o outliers (3SD)
					Post-test verbal average time - Correct only
					Post-test verbal median time
					Verbal accuracy pre/post change
					Verbal pre/post average time change
					Verbal pre/post time w/o outliers change (2SD)
					Verbal pre/post time w/o outliers change (3SD)
					Verbal pre/post time change - Correct only
					Verbal pre/post median time change
					Verbal Pretest List
					Verbal Posttest List
					SRT Pre Sequence Score
					SRT Post Sequence Score
